# Supplementary material for: Recognition and coupling of A-to-I edited sites are determined by the tertiary structure of the RNA
Source: PubMed Central journal article supplement — Nucleic Acids Res. 2009 Sep 8;37(20):6916–26. doi: 10.1093/nar/gkp731 (PMC2777444; doi:10.1093/nar/gkp731), 2009-09-08
Supplement: gkp731_1.pdf [file gkp731_1.pdf]

|            | # sing. | % sing. | % tot. | % multiple |
|------------|---------|---------|--------|------------|
| <b>E15</b> |         |         |        |            |
| A          | 7       | 4.3     | 19.3   | 15.0       |
| B          | 0       | 0       | 7.8    | 7.8        |
| C'         | 1       | 0.6     | 3.6    | 3.0        |
| C          | 4       | 2.5     | 21.1   | 18.6       |
| D          | 42      | 26.1    | 47.9   | 21.8       |
| # reads    | 161     |         |        |            |
| <b>E19</b> |         |         |        |            |
| A          | 145     | 10.9    | 56.3   | 45.5       |
| B          | 4       | 0.3     | 41.2   | 40.9       |
| C'         | 3       | 0.2     | 2.9    | 2.7        |
| C          | 16      | 1.2     | 20.8   | 19.6       |
| D          | 173     | 13.0    | 45.3   | 32.3       |
| # reads    | 1329    |         |        |            |
| <b>P2</b>  |         |         |        |            |
| A          | 6       | 9.0     | 77.3   | 68.3       |
| B          | 2       | 0.2     | 64.4   | 64.2       |
| C'         | 18      | 2.1     | 4.5    | 2.4        |
| C          | 4       | 0.5     | 23.5   | 23.0       |
| D          | 51      | 6.0     | 45.4   | 39.6       |
| # reads    | 853     |         |        |            |
| <b>P21</b> |         |         |        |            |
| A          | 40      | 5.2     | 85.2   | 80.0       |
| B          | 1       | 0.1     | 74.6   | 74.5       |
| C'         | 1       | 0.1     | 4.2    | 4.1        |
| C          | 9       | 1.1     | 25.6   | 24.5       |
| D          | 38      | 4.9     | 63.5   | 58.6       |
| # reads    | 769     |         |        |            |

|            | # sing. | % sing. | % tot. |
|------------|---------|---------|--------|
| <b>E15</b> |         |         |        |
| I/V        | 2       | 1.4     | 2.7    |
| Y/C        | 10      | 6.8     | 8.1    |
| # reads    | 146     |         |        |
| <b>E19</b> |         |         |        |
| I/V        | 112     | 6.1     | 26.2   |
| Y/C        | 469     | 25.6    | 47.9   |
| # reads    | 1832    |         |        |
| <b>P2</b>  |         |         |        |
| I/V        | 62      | 10.3    | 55.9   |
| Y/C        | 113     | 18.8    | 63.9   |
| # reads    | 600     |         |        |
| <b>P21</b> |         |         |        |
| I/V        | 0       | 0       | 73.8   |
| Y/C        | 12      | 6.3     | 80.5   |
| # reads    | 189     |         |        |

|            | # sing. | % sing. | % tot. | % multiple |
|------------|---------|---------|--------|------------|
| <b>E15</b> |         |         |        |            |
| -28        | -       | -       | n/d    | -          |
| -27        | 0       | 0.0     | <2     | <2         |
| -4         | 1       | 0.2     | <2     | <2         |
| -2         | 0       | 0.0     | <2     | <2         |
| -1         | 11      | 2.1     | 3.9    | 1.8        |
| +10        | 8       | 1.5     | 5.1    | 3.6        |
| +23        | 9       | 1.7     | 3.1    | 1.4        |
| +24        | 79      | 15.0    | 19.6   | 4.6        |
| +28        | 0       | 0.0     | <2     | <2         |
| # reads    | 526     |         |        |            |
| <b>E19</b> |         |         |        |            |
| -28        | 0       | 0.0     | 2.3    | 2.3        |
| -27        | 3       | 0.6     | <2     | <2         |
| -4         | 1       | 0.2     | <2     | <2         |
| -2         | 0       | 0.0     | <2     | <2         |
| -1         | 6       | 1.2     | 7.5    | 6.3        |
| +10        | 18      | 3.6     | 18.8   | 15.2       |
| +23        | 13      | 2.6     | 12.3   | 9.7        |
| +24        | 134     | 26.7    | 53.1   | 26.4       |
| +28        | 0       | 0.0     | 2.8    | 2.8        |
| # reads    | 502     |         |        |            |
| <b>P2</b>  |         |         |        |            |
| -28        | 7       | 0.9     | 3.8    | 2.9        |
| -27        | 0       | 0.0     | 2.2    | 2.2        |
| -4         | 0       | 0.0     | <2     | <2         |
| -2         | 0       | 0.0     | 7.0    | 7          |
| -1         | 7       | 0.9     | 11.6   | 10.7       |
| +10        | 21      | 2.7     | 23.7   | 21.0       |
| +23        | 13      | 1.7     | 12.5   | 10.8       |
| +24        | 247     | 31.6    | 65.4   | 33.8       |
| +28        | 0       | 0.0     | 2.6    | 2.6        |
| # reads    | 781     |         |        |            |
| <b>P21</b> |         |         |        |            |
| -28        | 0       | 0.0     | 8.8    | 8.8        |
| -27        | 0       | 0.0     | 16.2   | 16.2       |
| -4         | 0       | 0.0     | 11.4   | 11.4       |
| -2         | 0       | 0.0     | <2     | <2         |
| -1         | 5       | 3.9     | 25.9   | 22.0       |
| +10        | 3       | 2.3     | 34.7   | 32.4       |
| +23        | 1       | 0.8     | 30.5   | 29.7       |
| +24        | 23      | 17.8    | 80.9   | 63.1       |
| +28        | 0       | 0.0     | 10.4   | 10.4       |
| # reads    | 129     |         |        |            |

### Supplementary Table S1

Editing data for 5-HT<sub>2C</sub> (left top table), GluR-6 (left bottom table) and Adar2 (right table). Column 1 show days in development, specific sites of editing and total number of transcripts analyzed (# reads). Number of singularly edited transcripts (# sing.), frequency of singularly edited transcripts (% sing.) and total frequency of editing at the site (% tot.) are shown for all sites. Frequency of editing at multiple sites including the specific site and (% multiple) is shown for 5-HT<sub>2C</sub> and Adar2.
