# Supplementary material for: Recognition and coupling of A-to-I edited sites are determined by the tertiary structure of the RNA
Source: PubMed Central journal article supplement — Nucleic Acids Res. 2009 Sep 8;37(20):6916–26. doi: 10.1093/nar/gkp731 (PMC2777444; doi:10.1093/nar/gkp731), 2009-09-08
Supplement: gkp731_2.pdf [file gkp731_2.pdf]

**Supplementary Table S2.** Coupling between edited sites in mouse brain. If both the  $\chi^2$ -test and the cluster analyses show coupling it is assign (++). If one test show coupling it is indicated as (+). After the Bonferroni correction, column values should be compared to >10.22 for the Adar2 sites and >7.88 for the 5-HT2c sites. E15, E19 and P21 indicate editing at different developmental time points. n.d.= not determined

E15

| gene          | site      | $\chi^2$ | cluster (class) | conclusion | distance (nt) |
|---------------|-----------|----------|-----------------|------------|---------------|
| <i>adar2</i>  | -28 : -27 | n.d.     | -               |            |               |
|               | -28 : -4  | -        | -               |            |               |
|               | -28 : -2  | -        | -               |            |               |
|               | -28 : -1  | -        | -               |            |               |
|               | -28 : +10 | -        | -               |            |               |
|               | -28 : +23 | -        | -               |            |               |
|               | -28 : +24 | -        | -               |            |               |
|               | -28 : +28 | -        | -               |            |               |
|               | -27 : -4  | 1.811    | -               |            |               |
|               | -27 : -2  | 3.470    | -               |            |               |
|               | -27 : -1  | 0.050    | -               |            |               |
|               | -27 : +10 | 0.038    | -               |            |               |
|               | -27 : +23 | 0.098    | -               |            |               |
|               | -27 : +24 | 3.910    | -               |            |               |
|               | -27 : +28 | 3.474    | -               |            |               |
|               | -4 : -2   | 1.811    | -               |            |               |
|               | -4 : -1   | 0.001    | -               |            |               |
|               | -4 : +10  | 0        | -               |            |               |
|               | -4 : +23  | 15.27    | 2:3             | + coupled  | 26            |
|               | -4 : +24  | 0.324    | -               |            |               |
|               | -4 : +28  | 1.811    | -               |            |               |
|               | -2 : -1   | 22.77    | 1:3             | + coupled  | 1             |
|               | -2 : +10  | 20.79    | 1:3             | + coupled  | 11            |
|               | -2 : +23  | 0.098    | -               |            |               |
|               | -2 : +24  | 3.913    | -               |            |               |
|               | -2 : +28  | 3.474    | -               |            |               |
|               | -1 : +10  | 10.17    | 3:3             | + coupled  | 10            |
|               | -1 : +23  | 0.209    | -               |            |               |
|               | -1 : +24  | 13.319   | 3:3             | ++ coupled | 24            |
|               | -1 : +28  | 0.050    | -               |            |               |
|               | +10 : +23 | 25.45    | 3:3             | ++ coupled | 13            |
|               | +10 : +24 | 23.65    | 3:3             | ++ coupled | 14            |
| +10 : +28     | 0.038     | -        |                 |            |               |
| +23 : +24     | 1.088     | -        |                 |            |               |
| +23 : +28     | 0.098     | -        |                 |            |               |
| +24 : +28     | 3.913     | -        |                 |            |               |
| <i>5-ht2c</i> | AB        | 57.01    | 1:1             | ++ coupled | 2             |
|               | AC'       | 1.312    | -               |            |               |
|               | AC        | 12.28    | 1:3             | + coupled  | 7             |
|               | AD        | 0.001    | -               |            |               |
|               | BC'       | 0.453    | -               |            |               |
|               | BC        | 5.321    | -               |            |               |
|               | BD        | 0.300    | -               |            |               |
|               | C'C       | 1.104    | -               |            |               |
|               | C'D       | 0.373    | -               |            |               |
| CD            | 9.981     | 3:3      | ++ coupled      | 5          |               |
| <i>gluR-6</i> | I/V : Y/C | 9.517    | -               | coupled    | 13            |

E19

| gene          | site      | $\chi^2$ | cluster (class) | conclusion | distance (nt) |
|---------------|-----------|----------|-----------------|------------|---------------|
| <i>adar2</i>  | -28 : -27 | 0.033    | -               |            |               |
|               | -28 : -4  | 0        | -               |            |               |
|               | -28 : -2  | 3.591    | -               |            |               |
|               | -28 : -1  | 5.147    | -               |            |               |
|               | -28 : +10 | 4.362    | -               |            |               |
|               | -28 : +23 | 4.867    | -               |            |               |
|               | -28 : +24 | 10.54    | 1:4             | + coupled  | 51            |
|               | -28 : +28 | 0.137    | -               |            |               |
|               | -27 : -4  | 0.027    | -               |            |               |
|               | -27 : -2  | 7.347    | 2:2             | + coupled  | 25            |
|               | -27 : -1  | 4.445    | -               |            |               |
|               | -27 : +10 | 2.833    | -               |            |               |
|               | -27 : +23 | 0.041    | -               |            |               |
|               | -27 : +24 | 0.037    | -               |            |               |
|               | -27 : +28 | 0.033    | -               |            |               |
|               | -4 : -2   | 0.007    | -               |            |               |
|               | -4 : -1   | 1.903    | -               |            |               |
|               | -4 : +10  | 0.154    | -               |            |               |
|               | -4 : +23  | 0.684    | -               |            |               |
|               | -4 : +24  | 0.710    | -               |            |               |
|               | -4 : +28  | 0        | -               |            |               |
|               | -2 : -1   | 2.798    | -               |            |               |
|               | -2 : +10  | 1.374    | -               |            |               |
|               | -2 : +23  | 0.849    | -               |            |               |
|               | -2 : +24  | 7.806    | -               |            |               |
|               | -2 : +28  | 0.071    | -               |            |               |
|               | -1 : +10  | 3.004    | 4:4             | + coupled  | 10            |
|               | -1 : +23  | 5.975    | 4:4             | + coupled  | 23            |
|               | -1 : +24  | 8.110    | 4:4             | + coupled  | 24            |
|               | -1 : +28  | 0.017    | -               |            |               |
|               | +10 : +23 | 3.004    | 4:4             | + coupled  | 13            |
|               | +10 : +24 | 22.74    | 4:4             | ++ coupled | 14            |
|               | +10 : +28 | 8.015    | -               |            |               |
| +23 : +24     | 11.81     | 4:4      | ++ coupled      | 1          |               |
| +23 : +28     | 0.159     | -        |                 |            |               |
| +24 : +28     | 10.54     | 4:5      | + coupled       | 4          |               |
| <i>5-ht2c</i> | AB        | 652.9    | 1:1             | ++ coupled | 2             |
|               | AC'       | 0.118    | -               |            |               |
|               | AC        | 41.11    | 1:3             | + coupled  | 7             |
|               | AD        | 7.823    | 1:1             | + coupled  | 12            |
|               | BC'       | 0.978    | -               |            |               |
|               | BC        | 51.78    | 1:3             | + coupled  | 5             |
|               | BD        | 67.13    | 1:1             | ++ coupled | 10            |
|               | C'C       | 18.92    | 2:3             | + coupled  | 1             |
|               | C'D       | 3.033    | -               |            |               |
|               | CD        | 34.87    | 3:1             | + coupled  | 5             |
| <i>gluR-6</i> | I/V : Y/C | 252.7    |                 | coupled    |               |

P21

| gene          | site      | $\chi^2$ | cluster (class) | conclusion | distance (nt) |
|---------------|-----------|----------|-----------------|------------|---------------|
| <i>adar2</i>  | -28 : -27 | 1.586    | -               |            |               |
|               | -28 : -4  | 0.991    | -               |            |               |
|               | -28 : -2  | 0.003    | -               |            |               |
|               | -28 : -1  | 0.717    | -               |            |               |
|               | -28 : +10 | 10.81    | 1:2             | + coupled  | 37            |
|               | -28 : +23 | 0.066    | -               |            |               |
|               | -28 : +24 | 0.357    | -               |            |               |
|               | -28 : +28 | 1.723    | 1:1             | + coupled  | 55            |
|               | -27 : -4  | 2.690    | -               |            |               |
|               | -27 : -2  | 0.049    | -               |            |               |
|               | -27 : -1  | 1.866    | 2:2             | + coupled  | 26            |
|               | -27 : +10 | 0.364    | 2:2             | + coupled  | 36            |
|               | -27 : +23 | 0.463    | -               |            |               |
|               | -27 : +24 | 5.498    | 2:2             | + coupled  | 50            |
|               | -27 : +28 | 0.591    | -               |            |               |
|               | -4 : -2   | 0.009    | -               |            |               |
|               | -4 : -1   | 0.652    | -               |            |               |
|               | -4 : +10  | 3.635    | -               |            |               |
|               | -4 : +23  | 35.54    | 3:3             | ++ coupled | 26            |
|               | -4 : +24  | 3.584    | -               |            |               |
|               | -4 : +28  | 4.28     | -               |            |               |
|               | -2 : -1   | 0.152    | -               |            |               |
|               | -2 : +10  | 0.261    | -               |            |               |
|               | -2 : +23  | 0.204    | -               |            |               |
|               | -2 : +24  | 0.096    | -               |            |               |
|               | -2 : +28  | 0.005    | -               |            |               |
|               | -1 : +10  | 0.291    | 2:2             | + coupled  | 10            |
|               | -1 : +23  | 0.278    | -               |            |               |
|               | -1 : +24  | 0.013    | 2:2             | + coupled  | 24            |
|               | -1 : +28  | 0        | -               |            |               |
|               | +10 : +23 | 0.193    | -               |            |               |
|               | +10 : +24 | 0.425    | 2:2             | + coupled  | 14            |
|               | +10 : +28 | 0.587    | -               |            |               |
|               | +23 : +24 | 1.661    | -               |            |               |
| +23 : +28     | 2.476     | -        |                 |            |               |
| +24 : +28     | 1.163     | -        |                 |            |               |
| <i>5-ht2c</i> | AB        | 375.7    | 1:1             | ++ coupled | 2             |
|               | AC'       | 1.989    | -               |            |               |
|               | AC        | 8.331    | 1:3             | + coupled  | 7             |
|               | AD        | 29.37    | 1:1             | ++ coupled | 12            |
|               | BC'       | 0.477    | -               |            |               |
|               | BC        | 3.715    | -               |            |               |
|               | BD        | 45.76    | 1:1             | ++ coupled | 10            |
|               | C'C       | 5.761    | -               |            |               |
|               | C'D       | 3.148    | -               |            |               |
| CD            | 1.541     | -        |                 |            |               |
| <i>gluR-6</i> | I/V : Y/C | 132.2    | -               | coupled    | 13            |
