# Supplementary material for: Recognition and coupling of A-to-I edited sites are determined by the tertiary structure of the RNA
Source: PubMed Central journal article supplement — Nucleic Acids Res. 2009 Sep 8;37(20):6916–26. doi: 10.1093/nar/gkp731 (PMC2777444; doi:10.1093/nar/gkp731), 2009-09-08
Supplement: gkp731_3.pdf [file gkp731_3.pdf]

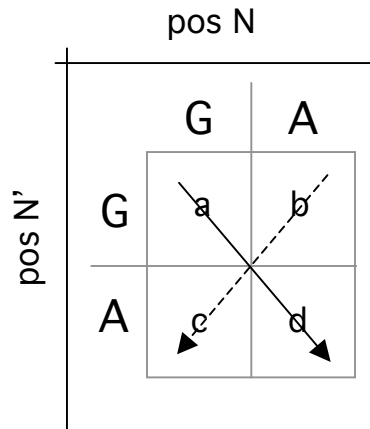

### Supplementary Figure S1

An example of the 2x2 matrix used in the  $\chi^2$ -test. a, b, c and d stands for the total number of GG, AG, GA, and AA respectively for the outcome of editing for two different positions. Following the solid arrow, we expect a positively coupled signal if the  $\chi^2$  value is above 10.22 (Adar2) or 7.85 (5-HT<sub>2C</sub>), after the Bonferroni correction. Negatively coupled position would have an over representation along the dotted arrow.
